1

2

3

4 **Prime editing in chicken fibroblasts and primordial germ cells**

5

6 Yuji Atsuta\*, Katsuya Suzuki, Haruna Yaguchi and Daisuke Saito

7

8 Department of Biology, Faculty of Science, Kyushu University, Fukuoka 819-0395,

9 Japan

10 \*Correspondence: [atsuta.yuji.360@m.kyushu-u.ac.jp](mailto:atsuta.yuji.360@m.kyushu-u.ac.jp) (Y.A.)

11

12

13

14

15

16

17

18

19

20

1    **ABSTRACT**

2    CRISPR/Cas9-based genome editing technologies are revolutionizing developmental  
3    biology. One of the advanced CRISPR-based techniques is prime editing (PE), which  
4    enables precise gene modification in multiple model organisms. In the current study, we  
5    describe a method to apply PE to the genome of chicken fibroblasts and primordial germ  
6    cells (PGCs). By combining PE with a transposon-mediated genomic integration, drug  
7    selection, and the single-cell culture method, we successfully generated prime-edited  
8    chick PGCs. The chicken PGC is widely used as an experimental model to study germ  
9    cell formation and as a vector for gene transfer to produce transgenic chickens. Such  
10   experimental models are useful in the developmental biology field and as potential  
11   bioreactors to produce pharmaceutical and nutritious proteins. Thus, the method  
12   presented here will provide not only a powerful tool to investigate gene function in germ  
13   cell development but also a basis for generating prime-edited transgenic birds.

14

15

16    *Keywords:*

17    gene editing, prime editing, primordial germ cell, chicken

18

19

20

## 1 1 | INTRODUCTION

2 Recent advances in genome editing techniques based on the CRISPR/Cas9 system  
3 enable efficient and precise genomic modification of animal models. The latest  
4 representative, and perhaps most useful, technology is prime editing (PE), which enables  
5 genetic information to be inserted into a targeted genomic locus (Anzalone *et al.*, 2019;  
6 Chen *et al.*, 2021). The PE system consists of two operational components, a prime  
7 editor and a prime editing guide RNA (pegRNA). The prime editor is a fused protein of  
8 catalytically defective Cas9 endonuclease (dCas9 nickase) and engineered reverse  
9 transcriptase. The pegRNA is both an extended guide RNA containing spacer sequences  
10 to recognize and navigate dCas9 to a target site and a template for reverse transcription  
11 that encodes the desired edit. In comparison with previous CRISPR-based genome  
12 editing techniques, PE has several advantages, including avoidance of a double strand  
13 break, less constraint of the protospacer adjacent motif (PAM) location, and greater  
14 versatility than the base editing system (Komor *et al.*, 2016; Rees & Liu, 2018;  
15 Scholefield & Harrison, 2021). Moreover, PE enables precise and efficient homology-  
16 directed repair in both mitotic and post-mitotic cells even without an additional repair  
17 donor construct (Anzalone *et al.*, 2019).

18 Chicken primordial germ cells (PGCs) have been used as a model to study germ  
19 line development and cell migration (Stebler *et al.*, 2004; Nakamura *et al.*, 2007;  
20 Nakamura *et al.*, 2013; Murai *et al.*, 2021). In addition, because chicken PGCs can be

1 expanded and gene-manipulated easily *in vitro* (Hong *et al.*, 1998; Macdonald *et al.*,  
2 2012; Whyte *et al.*, 2015), it has been used as a valuable vehicle of gene transfer to  
3 generate transgenic (TG) birds following the establishment of TG chickens by  
4 transplantation of genetically modified PGCs (van de Lavoie *et al.*, 2006; Han & Park,  
5 2018). TG chickens have great potential not only as a useful model for developmental  
6 biology but also as a bioreactor in the agricultural and pharmaceutical fields. Currently,  
7 CRISPR-based technologies, including base editing, have been used for genome  
8 modification of chicken PGCs (Dimitrov *et al.*, 2016; Idoko-Akoh *et al.*, 2018; Kim *et*  
9 *al.*, 2020; Lee *et al.*, 2020; Park *et al.*, 2020). However, PE has not yet been applied to  
10 chicken PGCs.

11 Here, we tested PE for a transgene (*EBFP*) and endogenous gene (*DDX4*, a gene  
12 encoding a DEAD box RNA helicase) in chicken fibroblasts and PGCs. By taking  
13 advantage of a long-term culture system for chick PGCs and Tol2 mobile element-  
14 mediated genomic integration (Sato *et al.*, 2007; Whyte *et al.*, 2015), we devised a  
15 method to efficiently obtain clones of prime-edited PGCs. This method will open paths  
16 to investigating molecular mechanisms underlying PGC formation and germ cell  
17 development and to generating precisely gene-modified chickens.

18

## 19 **2 | MATERIALS AND METHODS**

### 20 **2.1 | Experimental animals**

1 Fertilized chicken eggs were obtained from Fujino-Kohkaen (Fukuoka, Japan). Embryos  
2 were staged according to the Hamburger–Hamilton stages (Hamburger & Hamilton,  
3 1951). All animal experiments were conducted under the ethical approval of Kyushu  
4 University (No. A21-167-2).

## 5 **2.2 | Expression vectors and primers**

6 EBFP-C1 (#54738), PX459 (#62988), BPK1520 (#65777), pU6-pegRNA-GG-acceptor  
7 (#132777), pCMV-PE2 (#132775), pCMV-PEmax (#174820), and pEF1a-hMLH1dn  
8 (#174824) were obtained from Addgene. pCAGGS-T2TP has been described elsewhere  
9 (Sato *et al.*, 2007). For pT2A-CAGGS-EBFP, EBFP cDNA was amplified from EBFP-  
10 C1 by PCR with primers (EBFP-Fw, EBFP-Rv) and integrated into a MluI-NheI site of  
11 pT2A-CAGGS (Urasaki *et al.*, 2006) using a Gibson Assembly Kit (New England  
12 BioLabs). To obtain pT2A-CAGGS-PEmax-ires-ZsGreen1, "PEmax" cDNA coding a  
13 fusion protein of optimized dCas9 and MMLV-reverse transcriptase was amplified from  
14 pCMV-PEmax using primers (PEmax-Fw, PEmax-Rv) and inserted into a MluI-EcoRI  
15 site of pT2A-CAGGS-ZsGreen1 (Atsuta & Takahashi, 2016) using a Gibson Assembly  
16 Kit. The pegRNAs used in this study were designed using pegFinder  
17 (<http://pegfinder.sidichenlab.org>; Chow *et al.*, 2021). Template DNA (GFP pegRNA-1,  
18 GFP pegRNA-2, DDX4 pegRNA-1, DDX4 pegRNA-2, DDX4 pegRNA-3, DDX4  
19 pegRNA-4, and DDX4 pegRNA-5) for pegRNA expression were synthesized and  
20 cloned into BsaI sites of pU6-pegRNA-GG-acceptor using a Gibson Assembly Kit. To

1 obtain sgRNA-expressing PE3 plasmids (nicking vectors of the PE3 system), oligo  
2 nucleotides (PE3-EGFP-1-Fw and PE3-EGFP-1-Rv; PE3-EGFP-2-Fw and PE3-EGFP-  
3 2-Rv) were annealed and inserted into the BsmBI sites of BPK1520 using a Quick  
4 Ligation Kit (New England BioLabs). PuroR cDNA was amplified from PX459 with  
5 primers (PuroR-Fw, PuroP-Rv) and inserted into a MluI-EcoRI site of pT2A-CAGGS  
6 using a Gibson Assembly Kit, resulting in pT2A-CAGGS-PuroR. To construct the  
7 pT2A-U6-pegRNA-CAGGS-PuroR vector, U6-pegRNA and CAGGS-PuroR fragments  
8 were amplified with primers (U6-peg-Fw, U6-peg-Rv; CAG-PuroR-Fw, CAG-PuroR-  
9 Rv) from pegRNA vectors and pT2A-CAGGS-PuroR, respectively. The fragments were  
10 cloned into the ApaI-MluI and MluI-BglII sites of pT2A vectors using Ligation High  
11 ver.2 (TOYOBO), resulting in the construction of pT2A-U6-pegRNA-CAGGS-PuroR  
12 plasmids. Sequences of the primers, template DNA for pegRNA expression, and oligos  
13 for sgRNA-expressing PE3 plasmids are shown in Supplemental Table 1.

### 14 **2.3 | Cell culture and derivation of PGCs**

15 Chicken fibroblast-derived DF1 cells were maintained at 38°C with DMEM/F12 (Gibco)  
16 containing 10% fetal bovine serum (Biowest) and 1% penicillin–streptomycin (Gibco).  
17 PGCs were obtained and maintained as previously described (Whyte *et al.*, 2015), with  
18 minor modifications (Chen *et al.*, 2019). PGCs were derived by transferring 1–2 µL  
19 blood isolated from HH16 embryos in 300 µL of media (FACS media) composed of  
20 DMEM (Ca<sup>2+</sup> free, Gibco), 100 µM CaCl<sub>2</sub>, 1× B-27 supplement (Gibco), 2 mM

1 Glutamax (Gibco), 1× NEAA (Gibco), 55 μM β-mercaptoethanol (Gibco), 1.2 mM  
2 pyruvate (Gibco), 0.2% chick serum (Biowest), 0.2% ovalbumin (Sigma-Aldrich), 0.2%  
3 heparin (Sigma-Aldrich), 25 ng/mL of human activin A, and 4 ng/mL human FGF2  
4 (R&D). PGCs were basically maintained in the FAcS medium at 38°C.

#### 5 **2.4 | DNA transfection, FAC-sorting and PGC electroporation**

6 DF1 cells were seeded in a 48 well plate and transfected at 60–70% confluency with  
7 Lipofectamine 2000 (Thermo Fisher Scientific). To establish EBFP-expressing DF1  
8 cells, 1 μL Lipofectamine 2000, 750 ng pT2A-CAGGS-EBFP, and 250 ng pCAGGS-  
9 T2TP were transfected. One week after transfection, cells were dissociated with 100 μL  
10 0.05% trypsin–EDTA solution (Gibco), and EBFP-expressing cells were collected using  
11 an SH800 cell sorter (Sony). For PE in DF1 cells, 1 μL Lipofectamine 2000, 500 ng  
12 prime editor plasmid, 150 ng pegRNA plasmid, 50 ng sgRNA plasmid (a nicking  
13 plasmid for PE3; where indicated), and 150 ng pEF1a-hMLH1dn (where indicated) were  
14 used. The efficiency of EBFP-to-EGFP conversion was estimated using an SH800 cell  
15 sorter. To obtain the PEmax expressing DF1 cells, 1 μL Lipofectamine 2000, 750 ng  
16 pT2A-CAGGS-PEmax-ires-ZsGreen1, and 250 ng pCAGGS-T2TP were transfected  
17 and ZsGreen-positive cells were sorted using an SH800 cell sorter 1 week after  
18 transfection. For the second transfection to produce *DDX4* edited cells, pT2A-U6-  
19 pegRNA-CAGGS-PuroR and pEF1a-hMLH1dn were further introduced into PEmax-  
20 expressing cells. The cells were maintained in the presence of 1 μg/mL puromycin

1 (Nacalai Tesque) for 3 days, then washed to remove puromycin and further cultured to  
2 100% confluency. For electroporation to PGCs,  $2 \times 10^4$  PGCs were resuspended in 10  
3  $\mu$ L R buffer containing 1  $\mu$ g DNA plasmid (750 ng pT2A-CAGGS-EBFP, 250 ng  
4 pCAGGS-T2TP; 600 ng pCMV-PEmax, 300 ng GFP pegRNA-1 plasmid, 100 ng PE3-  
5 EGFP-1 plasmid; 750 ng pT2A-CAGGS-PEmax-ires-ZsGreen1, 250 ng pCAGGS-  
6 T2TP; 450 ng DDX4 pegRNA-4 plasmid, 100 ng PE3-DDX plasmid, 450 ng pEF1a-  
7 hMLH1dn) and electroporated using a Neon transfection system (Thermo Fisher  
8 Scientific) with three pulses of 1300 V for 10 ms. To select pegRNA-transfected cells,  
9 PGCs were selected using puromycin for 3 days, followed by 1 week of puromycin-free  
10 culture. For a clonal culture, individual cells were sorted in a 96 well plate using an  
11 SH800 cell sorter after puromycin selection and were then further cultured for 28 days.  
12 Genomic DNA extraction for the prime edited DF1 or PGCs was carried out with  
13 NucleoSpin Tissue XS (TAKARA) according to the manufacturer's protocol. To  
14 confirm the genomic edit, a portion of the *DDX4* locus (chrZ:16,929,487-16,929,972)  
15 was amplified by PCR with a set of primers (DDX4-seq-Fw, DDX4-seq-Rv) and the  
16 PCR products were sequenced using the DDX4-seq-Fw primer.

## 17 **2.5 | Embryo injection of PGCs**

18 EGFP-expressing PGCs (3000–5000 cells/ $\mu$ L) were injected into hearts of HH14 host  
19 embryos using a glass capillary and incubated until HH26 or HH30. Gonads of the host  
20 embryos were subject to immunological staining.



## 1    **2.6 | Immunohistochemistry**

2    For immunological staining on sections, the following primary antibodies were used:  
3    chick anti-GFP (1/1000; abcam, ab13970), rat anti-DDX4 (1/1000; (Yoshino *et al.*,  
4    2016)), and rabbit anti-Sox9 (1/500, Millipore, AB5535). Immunostaining for chicken  
5    embryos was carried out as previously described (Tomizawa *et al.*, 2021). The embryos  
6    were fixed in 4% PFA/PBS for 3 h at 4°C, placed in a series of sucrose/PBS solutions,  
7    and embedded in OCT compound (Sakura Finetek). Ten micrometer cryo-sections were  
8    permeabilized with 0.5% Triton X-100/PBS for 10 min and then incubated with  
9    blocking buffer (1% blocking reagent [Roche]/TNT) for 1 h, followed by incubation of  
10    primary antibodies overnight at 4°C. Sections were washed with TNT buffer and  
11    incubated with secondary antibodies for 5 h at 4°C. Alexa 488 anti-chicken IgY (abcam),  
12    Alexa 568 anti-rat IgG, Alexa 568 anti-rabbit IgG, and Alexa 488 anti-mouse IgG  
13    (Thermo Fisher Scientific) were used as secondary antibodies. Vectashield mounting  
14    media with DAPI (Vector Laboratories) was used before imaging. The sex of HH30  
15    gonads were determined by Sox9 positivity. For immunostaining with cultured PGCs,  
16    the cells were incubated with anti-DDX4 antibody after PFA fixation and  
17    permeabilization of 0.5% Triton X-100/PBS, followed by incubation of Alexa 568 anti-  
18    rat IgG.

## 19    **2.7 | Imaging and statistical analysis**

20    Images of stained sections were obtained using a Dragonfly confocal microscope

1 (Andor). Statistical analyses were performed with GraphPad Prism 9 software  
2 (GraphPad). The live cells in Fig. 4D were counted by using an automated cell counter  
3 (TC20, Bio-Rad), Counting slides (Bio-Rad), and trypan blue (FUJIFILM).

4

### 5 **3 | RESULTS AND DISCUSSION**

#### 6 **3.1 | PE is applicable to the chicken cell line**

7 To test whether PE can be used in avian cells and to efficiently visualize successful  
8 genomic modification by PE, we set up the EBFP–EGFP conversion system with the  
9 DF1 chicken fibroblast cell line. There are two nucleotide substitutions (T199C, A437T)  
10 that result in amino acid substitutions (Y66H, Y145F) between DNA sequences  
11 encoding enhanced green fluorescent protein (*EGFP*) and the enhanced blue fluorescent  
12 protein (*EBFP*) (Heim & Tsien, 1996) (Fig. 1A). One of the substitutions, designated as  
13 Target site-1 in the present study, is responsible for the determination of the fluorescent  
14 spectrum, whereas the other, Target site-2, enhances the brightness of blue fluorescence  
15 (Heim *et al.*, 1994; Heim & Tsien, 1996) (Fig. 1A). Thus, we expected that, if Target  
16 site-1 C<sup>199</sup> was replaced with thymidine using the PE technique, a successful  
17 replacement could be monitored via EGFP fluorescence. We generated the stable EBFP  
18 DF1 cell line by taking advantage of Tol2 transposon-mediated genomic integration  
19 (Urasaki *et al.*, 2006; Sato *et al.*, 2007) (Fig. 1B). Prime editor- and pegRNA-1 (pegRNA  
20 aiming Target site-1)-expressing vectors were transfected to the EBFP cells. As a result,

1 EGFP-expressing cells emerged 2 days after transfection, indicating that the PE  
2 technique is functional in chicken cells, as observed in other organisms (PE2; Fig. 1B).  
3 Editing Target site-2 generated no EGFP-positive cells, consistent with the results of a  
4 previous study (Fig. 1C) (Heim & Tsien, 1996).

5 Improved versions of PE that enhanced editing efficiency by manipulating the  
6 DNA repair machinery have recently been reported (Chen *et al.*, 2021). Therefore, we  
7 used the EBFP–EGFP conversion system to examine which version of the PE system  
8 was most effective in chicken cells (Fig. 1C). As expected, the EBFP–EGFP conversion  
9 efficiency of the PE3 system (PE2 plus a nicking vector) was higher than that of the PE2  
10 system (the prime editor vector plus a pegRNA expressing vector) (Fig. 1C). We further  
11 tested two engineered versions of PE: PE4 and PE5 (Chen *et al.*, 2021). PE4 is composed  
12 of PE2 and a dominant negative form of DNA mismatch repair protein (MLH1dn)-  
13 expressing vector, whereas PE5 is a combined system of PE3 and MLH1dn. As shown  
14 in Fig. 1C, the addition of MLH1dn substantially increased the conversion efficiency of  
15 PE2 and PE3 (Fig. 1C), suggesting that DNA repair machinery diminishes PE efficacy  
16 in chicken cells, consistent with its effect in other animal cells (Chen *et al.*, 2021). We  
17 also used a PEmax vector expressing an optimized prime editor architecture, instead of  
18 the basic one, in the PE4 system (referred to as PE4m) (Fig. 1C). The PE4m system  
19 yielded comparable efficiency as the PE5 system even in the absence of a nicking vector  
20 (Fig. 1C). Thus, the PE4m system was used in subsequent experiments.

### 1    **3.2 | PE does not affect migratory behavior of PGCs**

2    One of the major advantages of PE is that it leads to fewer off-target effects compared  
3    with conventional CRISPR/Cas9, thereby rarely causing phenotypic alteration  
4    (Anzalone *et al.*, 2019). Because we aimed at applying PE to chicken PGCs, we  
5    investigated whether PE affected PGC character by checking the migratory capability  
6    of prime-edited PGCs (Fig. 2). EGFP-positive PGCs generated using the Tol2 system  
7    have been shown to migrate correctly toward the genital ridge when injected into the  
8    circulation of host embryos (Macdonald *et al.*, 2012). EGFP-expressing PGCs derived  
9    from EBFP-positive cells were sorted and propagated in an optimal medium (FACS  
10    medium, see MATERIALS AND METHODS), then injected into HH14 host embryos  
11    (Fig. 2A, B). We found that the grafted PGCs could reach the genital ridge of HH26  
12    embryos and the developing gonads of both male and female HH30 embryos (Fig. 2B).  
13    These results suggest that PE does not affect the migratory behavior at least, which is  
14    one of the most representative traits of chicken PGCs.

### 15    **3.3 | Base substitution of *DDX4* gene by PE in the chicken cell line**

16    Having verified that transgenes in the chicken genome can be modified by PE, we next  
17    attempted to edit DNA sequences for endogenous genes. The *vasa* gene, which was  
18    originally isolated in *Drosophila* (Schupbach & Wieschaus, 1986), encodes a DEAD  
19    box RNA helicase, and chicken *vasa* homologue *cDDX4* (also referred to as *CVH*) is a  
20    prominent marker gene for PGCs (Tsunekawa *et al.*, 2000). Thus, we speculated that

1 *DDX4* could be a candidate to validate PE for an endogenous gene in chicken PGCs. We  
2 first experimented with DF1 cells because of their high availability (Fig. 3). To elevate  
3 editing efficiency and to concentrate gene-edited cells, we derived DF1 cells that stably  
4 expressed PEmax and ZsGreen1 bicistronically (Fig. 3A). We also used a puromycin  
5 selection to harvest only pegRNA-expressing cells (Fig. 3A). Considering the sequence  
6 preferences of guide RNAs in the CRISPR/Cas9 system (Xu *et al.*, 2015), we designed  
7 multiple pegRNAs: pegRNA-1, -2, and -3 to abrogate the start codon of *DDX4* and  
8 pegRNA-4 and -5 to install a stop codon downstream of the start codon (Fig. 3B).  
9 Genomic DNAs were extracted from DF1 cells transfected with PE components, and  
10 the targeted regions were sequenced (Fig. 3B). We observed peaks that originated from  
11 mutated alleles of the transfected cells, except in the case of pegRNA-5-transfected cells  
12 (Fig. 3B). Among pegRNA-1 to -4, pegRNA-4 appeared to be efficient, and the  
13 substitution (G → T) by pegRNA-4 could not be installed by base editing techniques  
14 already applied to genome modification in chickens (Komor *et al.*, 2016; Lee *et al.*,  
15 2020; Porto *et al.*, 2020). Therefore, pegRNA-4 was chosen to edit *DDX4* in PGC in  
16 subsequent experiments.

### 17 **3.4 | Development of a method to isolate prime-edited PGC clones**

18 Lastly, to isolate desired mutant PGC clones, we established a combined method of  
19 PE4m and a single-cell culture system (Fig. 4). PGCs transfected with both PEmax and  
20 pegRNA-4 vectors were obtained by taking advantage of FAC-sorting and puromycin

1 selection, as performed with DF1 (Fig. 4A). After we confirmed the substitution, we  
2 isolated the PGCs individually and expanded them in the FAcS medium for 4 weeks  
3 until sequencing analyses (Fig. 4B). Among 84 clones obtained, 7 clones had the desired  
4 substitution (8.3%), whereas the substitution was not detected in 14 clones (16.7%; Fig.  
5 4B). We observed nucleotide substitutions in the majority of the clones; however, most  
6 of them were incomplete (65.5%) or undesired (16.7%) edits (Fig. 4B). Nevertheless,  
7 our method successfully identified and isolated the PGC clones that harbored the precise,  
8 desired substitution.

9         We further examined whether *DDX4* was indeed knocked out by inserting a stop  
10 codon into the locus and whether the stop codon affected the proliferation of PGCs. By  
11 using the antibody that specifically recognizes the N-terminus of *DDX4* (Raucci *et al.*,  
12 2015, Yoshino *et al.*, 2016), we found that *DDX4* proteins were not translated in mutant  
13 cells, indicating the successful disruption of *DDX4* (Fig. 4C). To assess whether *DDX4*  
14 played a pivotal role in PGC proliferation, we counted the number of *DDX4*-KO cells.  
15 No significant difference was observed in the cell numbers between the unedited and  
16 edited groups (Fig. 4D), implying that *DDX4* is dispensable for mitosis of chicken PGC  
17 even though it is essential for meiotic processes during germ cell specification in  
18 multiple species (Kuramochi-Miyagawa *et al.*, 2010; Ewen-Campen *et al.*, 2013;  
19 Hartung *et al.*, 2014; Taylor *et al.*, 2017).

20         We successfully applied the PE technique to the chicken fibroblast cell line and

1 PGCs. Combined with Tol2 and the single-cell culture systems, this application enabled  
2 us to obtain the desired mutant PGC clones. The proposed method would provide precise  
3 genome editing in PGCs and enable tests for gene function in PGC development in both  
4 *in vitro* and *in vivo* settings. Furthermore, because the PGC-mediated germline  
5 transmission system is widely used to generate transgenic chickens (van de Lavoie *et al.*,  
6 2006; Macdonald *et al.*, 2010; Macdonald *et al.*, 2012; Oishi *et al.*, 2016; Kim *et al.*,  
7 2020; Lee *et al.*, 2020; Park *et al.*, 2020), our method could underlie potential  
8 applications for the efficient genomic modification of chickens.

9

## 10 **ACKNOWLEDGEMENTS**

11 We thank Dr. Ryan Delgado (Harvard Medical School) for helpful discussions and the  
12 Center for Advanced Instrumental and Educational Support of the Faculty of Agriculture  
13 (Kyushu University) for the use of the SH800. This work was supported by the JST  
14 FOREST Program, Grant Number JPMJFR214G (to Y.A.), and JSPS KAKENHI Grant  
15 Number JP20K22658, JP21K06201 (to Y.A.), and JP18H02445 (to D.S.).

16

## 17 **AUTHOR CONTRIBUTIONS**

18 **Yuji Atsuta:** study design; formal analysis; investigation; methodology; writing-  
19 original draft; writing-review & editing; funding acquisition. **Katsuta Suzuki:**  
20 investigation; methodology; writing-review & editing. **Haruna Yaguchi:** investigation;

1 methodology; writing-review & editing. **Daisuke Saito**: investigation; methodology;  
2 writing-review & editing; funding acquisition. All authors reviewed and approved the  
3 manuscript.

4

## 5 **CONFLICTS OF INTEREST**

6 No conflicts of interest are declared.

7

## 8 **REFERENCES**

9

- 10 Anzalone, A. V., Randolph, P. B., Davis, J. R. et al. 2019. Search-and-replace genome  
11 editing without double-strand breaks or donor DNA. *Nature*, **576**, 149-157.
- 12 Atsuta, Y. & Takahashi, Y. 2016. Early formation of the Müllerian duct is regulated by  
13 sequential actions of BMP/Pax2 and FGF/Lim1 signaling. *Development*, **143**,  
14 3549-3559.
- 15 Chen, P. J., Hussmann, J. A., Yan, J. et al. 2021. Enhanced prime editing systems by  
16 manipulating cellular determinants of editing outcomes. *Cell*, **184**, 5635-5652.
- 17 Chen, Y. C., Lin, S. P., Chang, Y. Y. et al. 2019. In vitro culture and characterization of  
18 duck primordial germ cells. *Poult Sci*, **98**, 1820-1832.
- 19 Chow, R. D., Chen, J. S., Shen, J. & Chen, S. 2021. A web tool for the design of prime-  
20 editing guide RNAs. *Nat Biomed Eng*, **5**, 190-194.
- 21 Dimitrov, L., Pedersen, D., Ching, K. H. et al. 2016. Germline Gene Editing in Chickens  
22 by Efficient CRISPR-Mediated Homologous Recombination in Primordial Germ  
23 Cells. *PLoS One*, **11**, e0154303.
- 24 Ewen-Campen, B., Donoughe, S., Clarke, D. N. & Extavour, C. G. 2013. Germ cell  
25 specification requires zygotic mechanisms rather than germ plasm in a basally  
26 branching insect. *Curr Biol*, **23**, 835-842.
- 27 Hamburger, V. & Hamilton, H. L. 1951. A series of normal stages in the development  
28 of the chick embryo. *J Morphol*, **88**, 49-92.
- 29 Han, J. Y. & Park, Y. H. 2018. Primordial germ cell-mediated transgenesis and genome  
30 editing in birds. *J Anim Sci Biotechnol*, **9**, 19.
- 31 Hartung, O., Forbes, M. M. & Marlow, F. L. 2014. Zebrafish vasa is required for germ-  
32 cell differentiation and maintenance. *Mol Reprod Dev*, **81**, 946-961.
- 33 Heim, R., Prasher, D. C. & Tsien, R. Y. 1994. Wavelength mutations and



- 1 posttranslational autoxidation of green fluorescent protein. *Proc Natl Acad Sci*  
2 *U S A*, **91**, 12501-12504.
- 3 Heim, R. & Tsien, R. Y. 1996. Engineering green fluorescent protein for improved  
4 brightness, longer wavelengths and fluorescence resonance energy transfer. *Curr*  
5 *Biol*, **6**, 178-182.
- 6 Hong, Y. H., Moon, Y. K., Jeong, D. K. & Han, J. Y. 1998. Improved transfection  
7 efficiency of chicken gonadal primordial germ cells for the production of  
8 transgenic poultry. *Transgenic Res*, **7**, 247-252.
- 9 Idoko-Akoh, A., Taylor, L., Sang, H. M. & Mcgrew, M. J. 2018. High fidelity  
10 CRISPR/Cas9 increases precise monoallelic and biallelic editing events in  
11 primordial germ cells. *Sci Rep*, **8**, 15126.
- 12 Kim, G. D., Lee, J. H., Song, S. et al. 2020. Generation of myostatin-knockout chickens  
13 mediated by D10A-Cas9 nickase. *Faseb j*, **34**, 5688-5696.
- 14 Komor, A. C., Kim, Y. B., Packer, M. S., Zuris, J. A. & Liu, D. R. 2016. Programmable  
15 editing of a target base in genomic DNA without double-stranded DNA cleavage.  
16 *Nature*, **533**, 420-424.
- 17 Kuramochi-Miyagawa, S., Watanabe, T., Gotoh, K. et al. 2010. MVH in piRNA  
18 processing and gene silencing of retrotransposons. *Genes Dev*, **24**, 887-892.
- 19 Lee, K. Y., Lee, H. J., Choi, H. J. et al. 2020. Highly elevated base excision repair  
20 pathway in primordial germ cells causes low base editing activity in chickens.  
21 *Faseb j*, **34**, 15907-15921.
- 22 Macdonald, J., Glover, J. D., Taylor, L., Sang, H. M. & Mcgrew, M. J. 2010.  
23 Characterisation and germline transmission of cultured avian primordial germ  
24 cells. *PLoS One*, **5**, e15518.
- 25 Macdonald, J., Taylor, L., Sherman, A. et al. 2012. Efficient genetic modification and  
26 germ-line transmission of primordial germ cells using piggyBac and Tol2  
27 transposons. *Proc Natl Acad Sci U S A*, **109**, E1466-1472.
- 28 Murai, H., Shibuya, M., Kishita, R., Sunase, C., Tamura, K. & Saito, D. 2021.  
29 Envelopment by endothelial cells initiates translocation of avian primordial germ  
30 cell into vascular tissue. *Dev Dyn*, **250**, 1410-1419.
- 31 Nakamura, Y., Kagami, H. & Tagami, T. 2013. Development, differentiation and  
32 manipulation of chicken germ cells. *Dev Growth Differ*, **55**, 20-40.
- 33 Nakamura, Y., Yamamoto, Y., Usui, F. et al. 2007. Migration and proliferation of  
34 primordial germ cells in the early chicken embryo. *Poult Sci*, **86**, 2182-2193.
- 35 Oishi, I., Yoshii, K., Miyahara, D., Kagami, H. & Tagami, T. 2016. Targeted  
36 mutagenesis in chicken using CRISPR/Cas9 system. *Sci Rep*, **6**, 23980.
- 37 Park, J. S., Lee, K. Y. & Han, J. Y. 2020. Precise Genome Editing in Poultry and Its  
38 Application to Industries. *Genes (Basel)*, **11**, 1182.
- 39 Porto, E. M., Komor, A. C., Slaymaker, I. M. & Yeo, G. W. 2020. Base editing: advances  
40 and therapeutic opportunities. *Nat Rev Drug Discov*, **19**, 839-859.

- 1    Raucci, F., Fuet, A. & Pain, B. 2015. In vitro generation and characterization of chicken  
2            long-term germ cells from different embryonic origins. *Theriogenology*, **84**, 732-  
3            742.e731-732.
- 4    Rees, H. A. & Liu, D. R. 2018. Base editing: precision chemistry on the genome and  
5            transcriptome of living cells. *Nat Rev Genet*, **19**, 770-788.
- 6    Sato, Y., Kasai, T., Nakagawa, S. et al. 2007. Stable integration and conditional  
7            expression of electroporated transgenes in chicken embryos. *Dev Biol*, **305**, 616-  
8            624.
- 9    Scholefield, J. & Harrison, P. T. 2021. Prime editing - an update on the field. *Gene Ther*,  
10           **28**, 396-401.
- 11   Schupbach, T. & Wieschaus, E. 1986. Germline autonomy of maternal-effect mutations  
12            altering the embryonic body pattern of *Drosophila*. *Dev Biol*, **113**, 443-448.
- 13   Stebler, J., Spieler, D., Slanchev, K. et al. 2004. Primordial germ cell migration in the  
14            chick and mouse embryo: the role of the chemokine SDF-1/CXCL12. *Dev Biol*,  
15            **272**, 351-361.
- 16   Taylor, L., Carlson, D. F., Nandi, S., Sherman, A., Fahrenkrug, S. C. & McGrew, M. J.  
17            2017. Efficient TALEN-mediated gene targeting of chicken primordial germ  
18            cells. *Development*, **144**, 928-934.
- 19   Tomizawa, R. R., Tabin, C. J. & Atsuta, Y. 2021. In ovo electroporation of chicken limb  
20            bud ectoderm: Electroporation to chick limb ectoderm. *Dev Dyn*.
- 21   Tsunekawa, N., Naito, M., Sakai, Y., Nishida, T. & Noce, T. 2000. Isolation of chicken  
22            vasa homolog gene and tracing the origin of primordial germ cells. *Development*,  
23            **127**, 2741-2750.
- 24   Urasaki, A., Morvan, G. & Kawakami, K. 2006. Functional dissection of the Tol2  
25            transposable element identified the minimal cis-sequence and a highly repetitive  
26            sequence in the subterminal region essential for transposition. *Genetics*, **174**,  
27            639-649.
- 28   Van De Lavoie, M. C., Diamond, J. H., Leighton, P. A. et al. 2006. Germline  
29            transmission of genetically modified primordial germ cells. *Nature*, **441**, 766-  
30            769.
- 31   Whyte, J., Glover, J. D., Woodcock, M. et al. 2015. FGF, Insulin, and SMAD Signaling  
32            Cooperate for Avian Primordial Germ Cell Self-Renewal. *Stem Cell Reports*, **5**,  
33            1171-1182.
- 34   Xu, H., Xiao, T., Chen, C. H. et al. 2015. Sequence determinants of improved CRISPR  
35            sgRNA design. *Genome Res*, **25**, 1147-1157.
- 36   Yoshino, T., Murai, H. & Saito, D. 2016. Hedgehog-BMP signalling establishes  
37            dorsoventral patterning in lateral plate mesoderm to trigger gonadogenesis in  
38            chicken embryos. *Nat Commun*, **7**, 12561.

39

1 **Figure legends**

2 **FIGURE 1**

3 **Prime editing for transgenes in chicken fibroblast cells**

4 (A) Target sites for EBFP–EGFP conversion by prime editing (PE). PAM sequences are  
5 underlined. (B) EBFP-expressing DF1 cells were transfected with prime editor- and  
6 pegRNA-1 (targeting site-1)-expressing plasmids (PE2 plasmids), and a small fraction  
7 of the cells started showing EGFP fluorescence (arrowheads). The fluorescence was  
8 validated by FACS. (C) Comparison of different PE conditions for the EBFP/EGFP  
9 conversion in DF1 cells ( $n = 14$  wells for each condition). PE3 vectors are nicking  
10 plasmids. The numbers show  $P$  values obtained using ordinary one-way ANOVA. Scale  
11 bars: 200  $\mu\text{m}$  in (B, C).

12

13 **FIGURE 2**

14 **Grafted prime-edited PGCs migrate correctly to the genital ridge in chicken**  
15 **embryos**

16 (A) *EBFP* genes in EBFP-expressing PGCs were converted to *EGFP* by prime editing  
17 (PE4m). (B, C) The PEed EGFP-expressing PGCs were sorted and subsequently  
18 transplanted into HH14 embryos. The grafted cells were found at the genital ridges of  
19 HH26 (B;  $n = 4$  embryos) and HH30 male and female embryos (C;  $n = 3$  for each sex).  
20 Scale bars: 50  $\mu\text{m}$  in (A), 100  $\mu\text{m}$  in (B), 200  $\mu\text{m}$  in (C).

1

## 2 **FIGURE 3**

### 3 **Prime editing for an endogenous gene in chicken fibroblast cells**

4 (A) Schematics for *DDX4* locus and strategy for editing *DDX4* in DF1 cells. The *DDX*  
5 gene lies at chrZ: 16,929,379–16,960,987. Cells that stably express PEmax and  
6 ZsGreen1 (ZsG) were established by taking advantage of Tol2-mediated genomic  
7 integration, and the ZsG<sup>+</sup> cells were FAC-sorted. PegRNA-transfected cells were further  
8 selected by puromycin. After the selection, DNAs extracted from transfected cells were  
9 subject to Sanger sequencing. (B) Chromatograms of DNA sequences coding for the  
10 first three codons of *DDX4*. PegRNAs were designed to abrogate the first codon ATG  
11 (pegRNA-1, -2, and -3) or to generate a stop codon after ATG (pegRNA-4 and -5). Peaks  
12 for the edited nucleotides are indicated by arrowheads. Scale bar: 100 μm in (A).

13

## 14 **FIGURE 4**

### 15 **Isolation of the prime-edited PGC clones**

16 (A) PEmax and ZsGreen-expressing PGCs were generated and collected using a cell  
17 sorter. After transfection of pegRNA-4 vector and puromycin selection, DNAs were  
18 extracted from the transfected PGCs and sequenced to validate the successful edit (red  
19 arrowhead). (B) Schematic of experiments for identifying the edited PGC clones.  
20 Individual cells were isolated using a sorter and cultured for 28 days before sequencing.

1 Traces represent completely, incompletely, and unwantedly edited DNA sequences  
2 ("Completed," "Incompleted," and "Unwanted," respectively). The pie chart shows the  
3 percentage of each genotypic group. (C) "Unedited" and "Completed" PGCs were  
4 immunostained against DDX4. DDX4 proteins were not detected in mutated cells. (D)  
5 Cell numbers were measured 28 days after the single-cell isolation ( $n = 7$  wells for  
6 "completed,"  $n = 7$  wells for "incompleted,"  $n = 14$  wells for "unedited"). The numbers  
7 indicate  $P$  values obtained using an ordinary one-way ANOVA. Scale bars: 100  $\mu\text{m}$  in  
8 (A, B), 20  $\mu\text{m}$  in (C).  
9

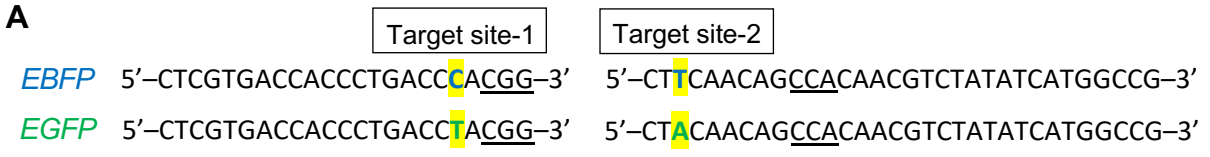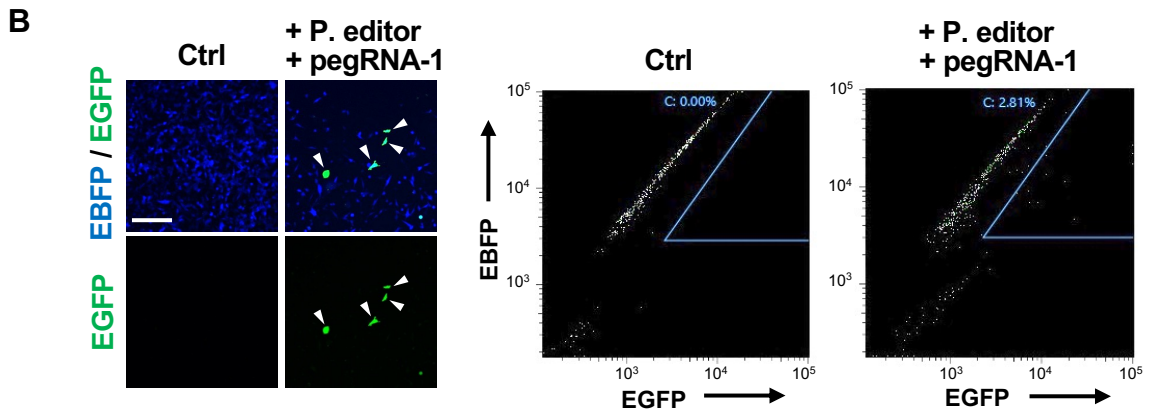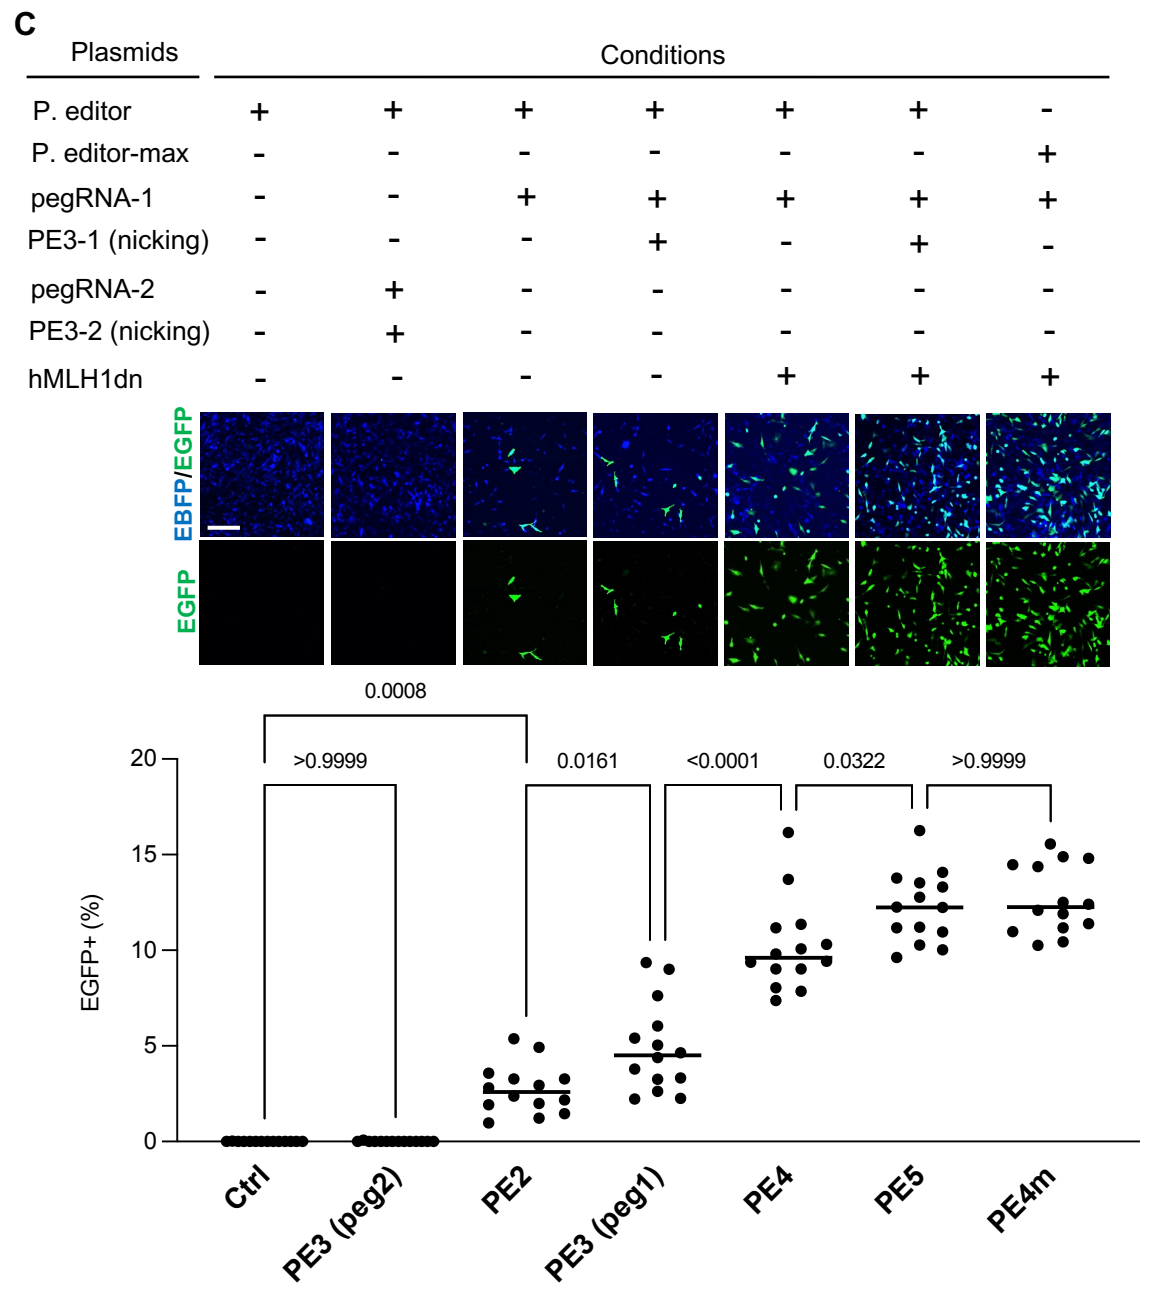

Fig.1 Atsuta et al.

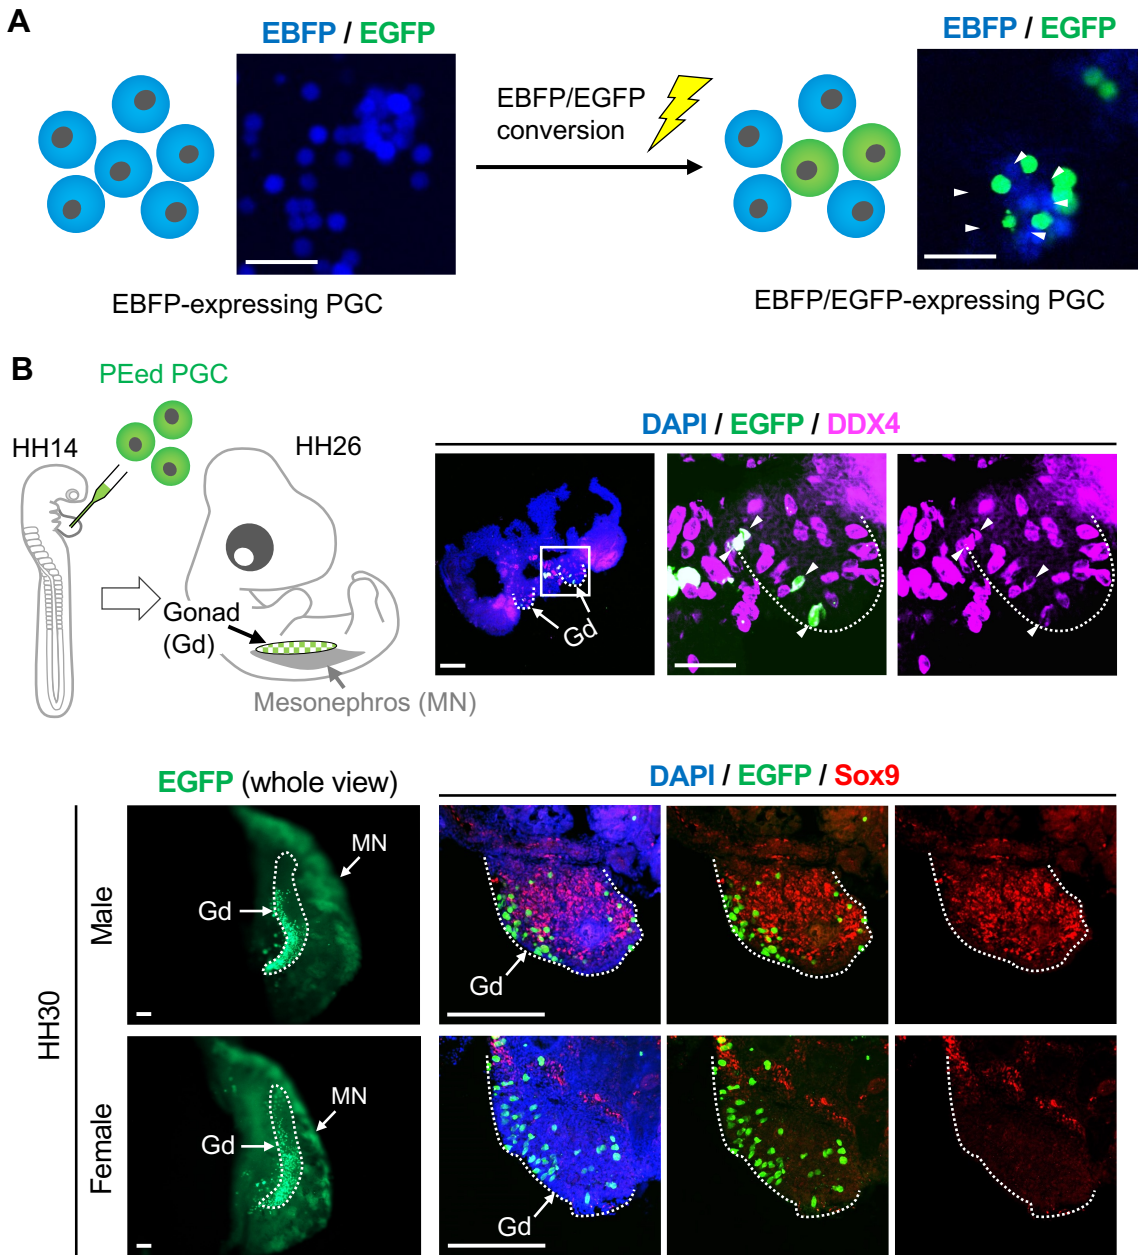

Fig.2 Atsuta et al.

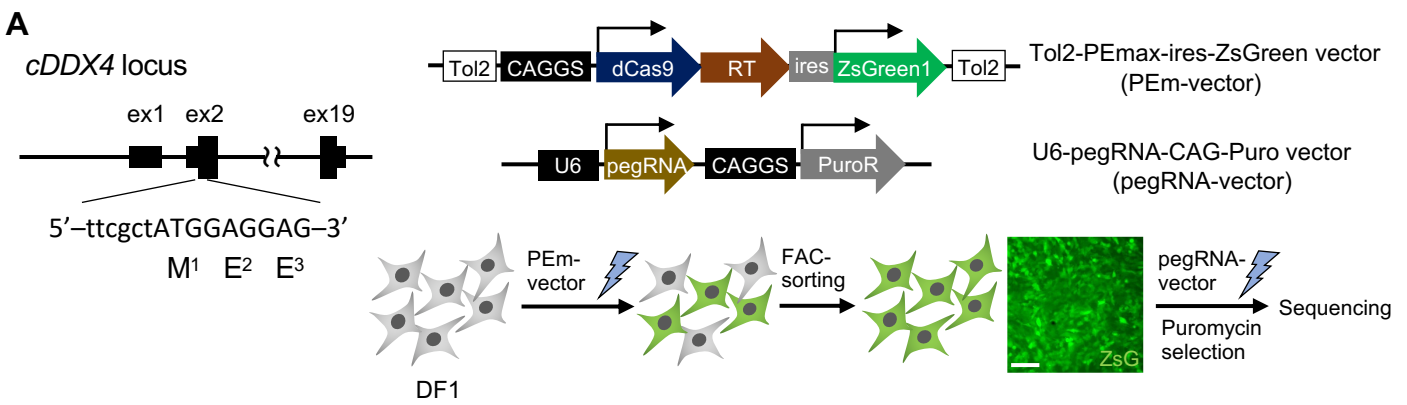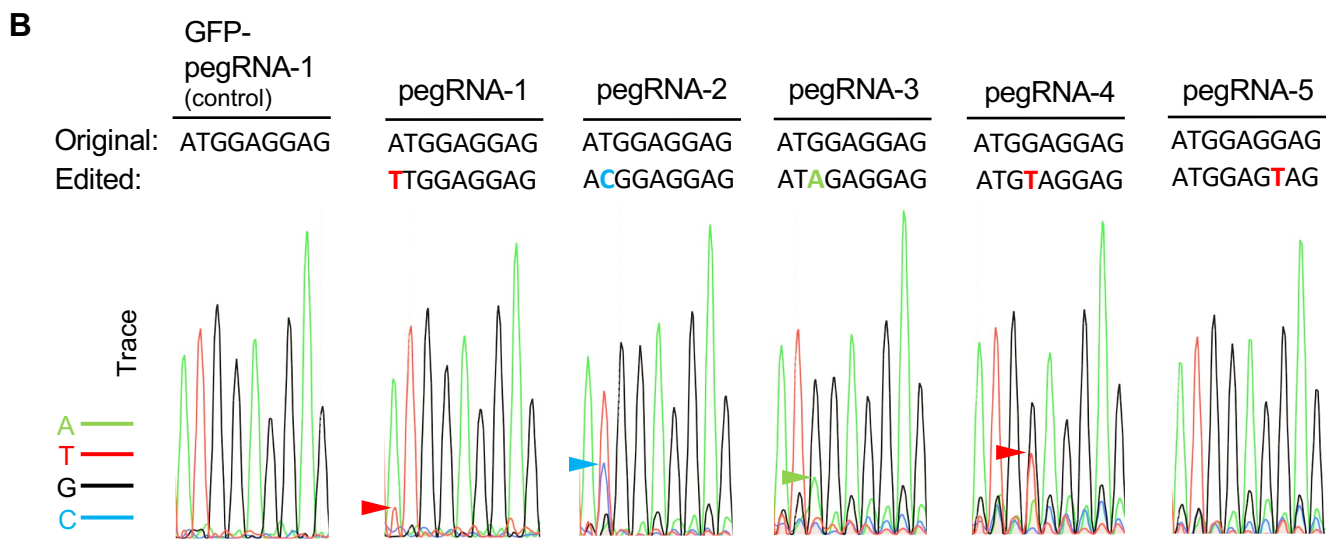



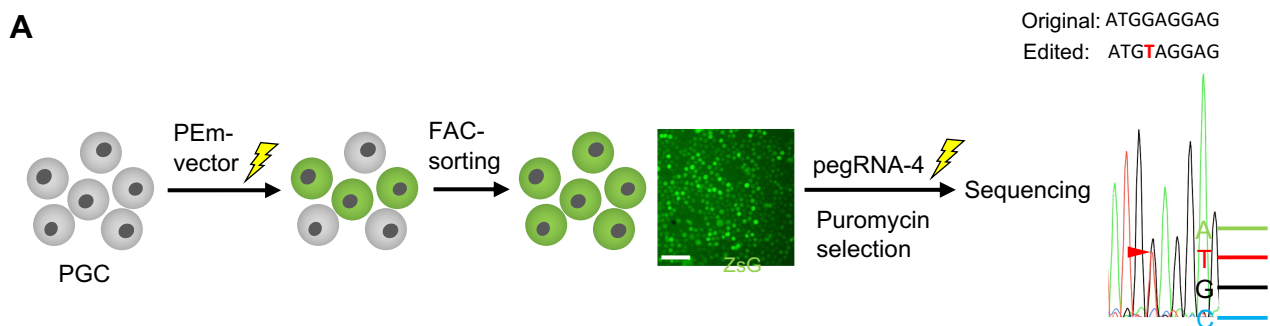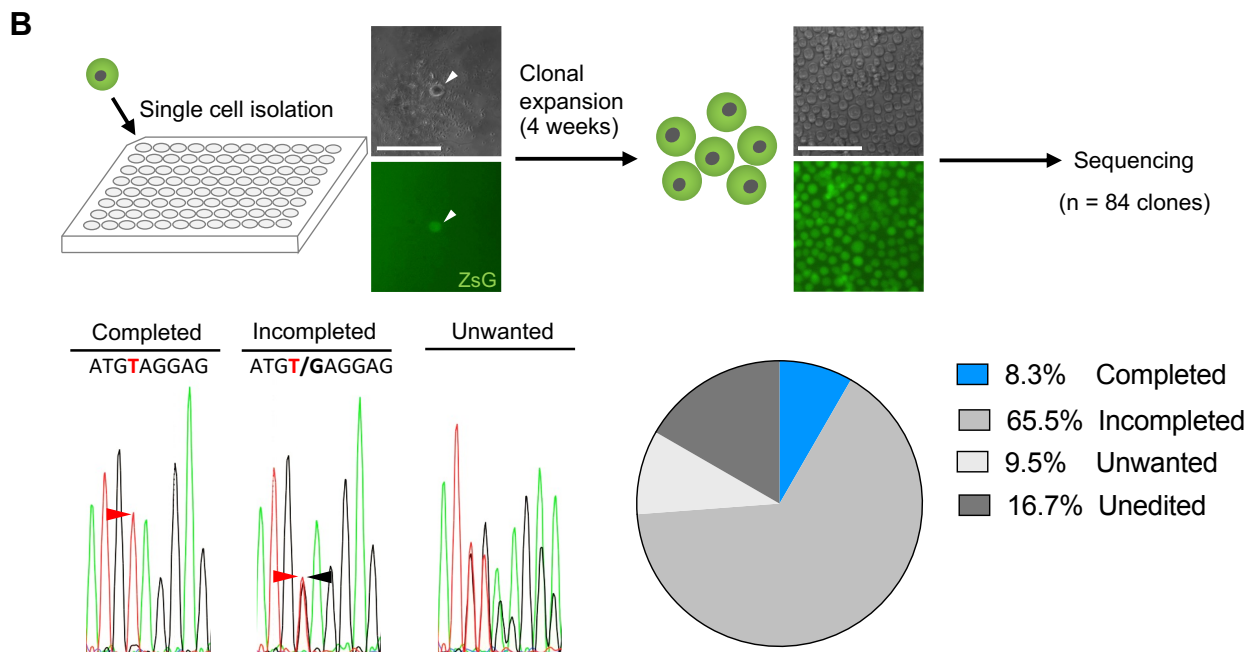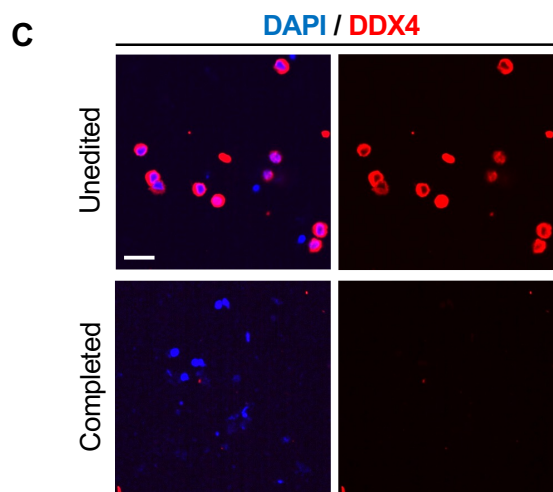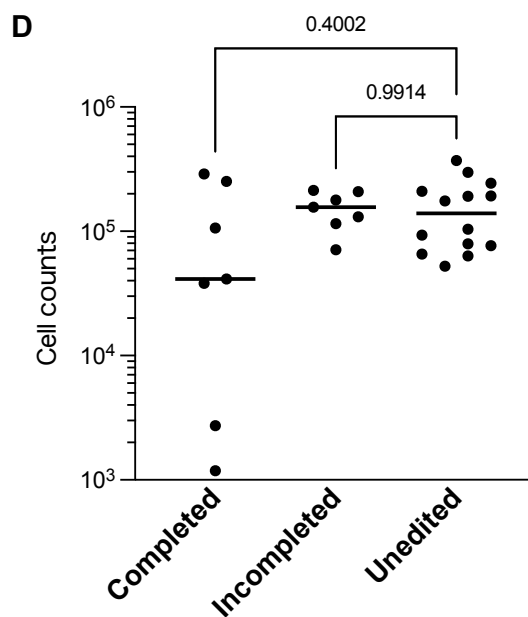

**Table S1-Sequences of primers and pegRNA templates**

| Name          | Sequence (5'-3' direction)                                                                                                                                                      |
|---------------|---------------------------------------------------------------------------------------------------------------------------------------------------------------------------------|
| EBFP-Fw       | TTTGCCAAAGAATTAGCCACCATGGTGAACAAGG                                                                                                                                              |
| EBFP-Rv       | ATCCCGGGCTCGAGGTTACTTGTACAGCTCGTCCATGC                                                                                                                                          |
| PEmax-Fw      | TTTGCCAAAGAATTAGCCACCATGAAACGGACAG                                                                                                                                              |
| PEmax-Rv      | ATCCCATCTAGAATTTTAGTCCAGCTTCACTCTCTT                                                                                                                                            |
| PuroR-Fw      | TTTGCCAAAGAATTAATGACCGAGTACAAGCCAC                                                                                                                                              |
| PuroR-Rv      | GGAAAAAGATCTGATAATTCTCAGGCACCGGGCTT                                                                                                                                             |
| CAG-PuroR-Fw  | ATAACGCGTCGGGGTCATTAGTTCATAGC                                                                                                                                                   |
| CAG-PuroR-Rv  | GGCAGAGGGAAAAAGATCTG                                                                                                                                                            |
| U6-peg-Fw     | ATAGGGCCCGAGGGCCTATTTCCCATGAT                                                                                                                                                   |
| U6-peg-Rv     | ATAACGCGTATCAGCTTGGGCTGCAGAAA                                                                                                                                                   |
| DDX4-seq-Fw   | AACCACAATGGAGCCATAGC                                                                                                                                                            |
| DDX4-seq-Rv   | AAAACCGTTGCCTCTCTGTAC                                                                                                                                                           |
| PE3-EGFP-1-Fw | CACCGCTGCACGCCGTAGGTCAGGG                                                                                                                                                       |
| PE3-EGFP-1-Rv | AAACCCCTGACCTACGGCGTGCAGC                                                                                                                                                       |
| PE3-EGFP-2-Fw | CACCGGCATCGACTTCAAGGAGGA                                                                                                                                                        |
| PE3-EGFP-2-Rv | AAACTCCTCCTTGAAGTCGATGCCCG                                                                                                                                                      |
| GFP pegRNA-1  | GTGGAAAGGACGAAACACCGCTCGTGACCACCTGACCCAGTTTTAGAGCTAGAAAATAGCAAGTTAAAAAAGG<br>CTAGTCCGTTATCAACTTGAAAAAGTGGCACCAGTCCGGTGCAGTGCACCGCCGTAGGTCAGGGTGGTTTTTTTT<br>AAGCTTGGGCCG        |
| GFP pegRNA-2  | GTGGAAAGGACGAAACACCGCGGCCATGATATAGACGTTGGTTTTAGAGCTAGAAAATAGCAAGTTAAAAAAGG<br>CTAGTCCGTTATCAACTTGAAAAAGTGGCACCAGTCCGGTGCAGTGCACCAACAGCCACAACGCTATATCATGGT<br>TTTTTTAAGCTTGGGCCG |
| DDX4 pegRNA-1 | GTGGAAAGGACGAAACACCGTGGCTGCTGGCATTGCTAGTTTTAGAGCTAGAAAATAGCAAGTTAAAAAAGG<br>CTAGTCCGTTATCAACTTGAAAAAGTGGCACCAGTCCGGTGCAGTCCCTCCCAAAGCGAATGCCAGCATTTTTT<br>TAAGCTTGGGCCG         |
| DDX4 pegRNA-2 | GTGGAAAGGACGAAACACCGCTGCTGGCATTGCTATGGTTTTAGAGCTAGAAAATAGCAAGTTAAAAAAGG<br>TAGTCCGTTATCAACTTGAAAAAGTGGCACCAGTCCGGTGCAGTCCCTCCCTATAGCGAATGCCATTTTTTTAAG<br>CTTGGGCCG             |
| DDX4 pegRNA-3 | GTGGAAAGGACGAAACACCGCTGCTGGCATTGCTATGGTTTTAGAGCTAGAAAATAGCAAGTTAAAAAAGG<br>TAGTCCGTTATCAACTTGAAAAAGTGGCACCAGTCCGGTGCAGTCCCTCCCTATAGCGAATGCCATTTTTTTAAG<br>CTTGGGCCG             |
| DDX4 pegRNA-4 | GTGGAAAGGACGAAACACCGCTGCTGGCATTGCTATGGTTTTAGAGCTAGAAAATAGCAAGTTAAAAAAGG<br>TAGTCCGTTATCAACTTGAAAAAGTGGCACCAGTCCGGTGCAGTCCCTCCCTATAGCGAATGCCATTTTTTTAAG<br>CTTGGGCCG             |
| DDX4 pegRNA-5 | GTGGAAAGGACGAAACACCGCTGCTGGCATTGCTATGGAGGTTTTAGAGCTAGAAAATAGCAAGTTAAAAAAGG<br>TAGTCCGTTATCAACTTGAAAAAGTGGCACCAGTCCGGTGCAGTCCCTACTCCATAGCGAATGTTTTTTAAG<br>CTTGGGCCG             |
